# Supplementary material for: Mobile Colistin Resistance (mcr) Gene-Containing Organisms in Poultry Sector in Low- and Middle-Income Countries: Epidemiology, Characteristics, and One Health Control Strategies
Source: MDPI journal article supplement (doi:10.3390/antibiotics12071117), 2023-06-28
Supplement: s1 [file s1]

**Table S1:** Studies reporting on plasmid mediated colistin resistance in the poultry meat supply chain in China

| Source of isolate                                         | Date of isolation ( <i>mcr</i> gene assayed) | Number of isolates tested for <i>mcr</i> | Identified gene/variant (Number of organism)                                    | Sequence type and/or phylogroup (Virulence genes)                                               | Plasmid (Associated Insertion sequence)                                             | Additional resistance traits                                                                                                                                                                                                                                               | Reference                                                     |
|-----------------------------------------------------------|----------------------------------------------|------------------------------------------|---------------------------------------------------------------------------------|-------------------------------------------------------------------------------------------------|-------------------------------------------------------------------------------------|----------------------------------------------------------------------------------------------------------------------------------------------------------------------------------------------------------------------------------------------------------------------------|---------------------------------------------------------------|
| Chicken meats                                             | 2011-2014 ( <i>mcr</i> -1)                   | 357                                      | <i>mcr</i> -1 (35 <i>E. coli</i> )                                              | -                                                                                               | IncI2 and IncHI2 ( <i>IS<sub>AplI</sub></i> )                                       | <i>fosA3</i> , <i>bla<sub>CTX-M-44</sub></i> and <i>oqx<sub>B</sub></i>                                                                                                                                                                                                    | Liu <i>et al.</i> (2016)*; Chipping Zhu <i>et al.</i> (2016)* |
| Chickens                                                  | 1970-2014 ( <i>mcr</i> -1)                   | 1160                                     | <i>mcr</i> -1 (104 <i>E. coli</i> )                                             | -                                                                                               | -                                                                                   | -                                                                                                                                                                                                                                                                          | Shen <i>et al.</i> (2016)*                                    |
| Mucovy duck                                               | 2015 ( <i>mcr</i> -1)                        | 2                                        | <i>mcr</i> -1 (2 <i>E. coli</i> )                                               | ST648 and ST156 (B1 and D)                                                                      | IncI2 and IncHI2                                                                    | <i>bla<sub>NDM-5</sub></i> , <i>bla<sub>CTX-M-55</sub></i> , <i>bla<sub>TEM-1</sub></i> , <i>bla<sub>CMY-2</sub></i> , <i>rmtB</i> , <i>aac(6')-Ib</i> and <i>fosA3</i>                                                                                                    | Yang <i>et al.</i> (2016)*                                    |
| Chickens and ducks                                        | 2014-2015 ( <i>mcr</i> -1 to <i>mcr</i> -3)  | 448                                      | <i>mcr</i> -1 (13 <i>E. coli</i> from chickens and 3 <i>E. coli</i> from ducks) | -                                                                                               | -                                                                                   | -                                                                                                                                                                                                                                                                          | Yassin <i>et al.</i> (2017)*                                  |
| Chickens                                                  | 2015 ( <i>mcr</i> -1)                        | 3                                        | <i>mcr</i> -1 (2 <i>Cronobacter sakazakii</i> and 1 <i>E. coli</i> )            | -                                                                                               | -                                                                                   | <i>C. sakazakii</i> : <i>floR</i> , <i>qnrS</i> , <i>bla<sub>NDM-9</sub></i> , <i>fosA</i> , <i>bla<sub>CTX-M-65</sub></i> and <i>bla<sub>CTX-M-55</sub></i> ; <i>E. coli</i> : as above except <i>qnrS</i> , <i>bla<sub>CTX-M-55</sub></i> and <i>bla<sub>NDM-9</sub></i> | Liu <i>et al.</i> (2017)*                                     |
| Chicken meat                                              | 2014 ( <i>mcr</i> -1)                        | 1                                        | <i>mcr</i> -1 (1 <i>E. coli</i> )                                               | ST167                                                                                           | IncI2                                                                               | <i>bla<sub>NDM-9</sub></i> , <i>fosA3</i> , <i>rmtB</i> , <i>bla<sub>CTX-M-65</sub></i> and <i>floR</i>                                                                                                                                                                    | Yao <i>et al.</i> (2016)*                                     |
| Chicken                                                   | 2012 ( <i>mcr</i> -1)                        | 1                                        | <i>mcr</i> -1 (1 <i>E. coli</i> )                                               | ST1011                                                                                          | IncI2 ( <i>IS<sub>AplI</sub></i> for <i>mcr</i> -1 and <i>ISEcp1</i> for ESBL gene) | <i>bla<sub>CTX-M-55</sub></i>                                                                                                                                                                                                                                              | Sun <i>et al.</i> (2016)*                                     |
| Chickens                                                  | 2007-2015 ( <i>mcr</i> -1)                   | 16                                       | <i>mcr</i> -1 (2 salmonellae)                                                   | ST34                                                                                            | IncHI2, IncI2, IncFIB and IncFII                                                    | <i>oqxAB</i> , <i>aac(6')-Ib-cr</i> and <i>floR</i>                                                                                                                                                                                                                        | Li <i>et al.</i> (2016)*                                      |
| Chickens                                                  | 2014-2015 ( <i>mcr</i> -1)                   | 53                                       | <i>mcr</i> -1 (4 salmonellae)                                                   | ST292 <i>Salmonella enterica</i> serovar Albany                                                 | IncI2 ( <i>IS<sub>AplI</sub></i> for <i>mcr</i> -1 and <i>ISEcp1</i> for ESBL gene) | <i>bla<sub>CTX-M-55</sub></i>                                                                                                                                                                                                                                              | Yang <i>et al.</i> (2016)*                                    |
| Chickens                                                  | 2011-2012 ( <i>mcr</i> -1)                   | 96                                       | <i>mcr</i> -1 (2 <i>E. coli</i> )                                               | ST117 and ST22                                                                                  | IncFIC, IncFII, IncFIB, IncI1 and IncI2                                             | Class 1 integron, <i>bla<sub>TEM-1B</sub></i> , <i>bla<sub>TEM-99</sub></i> , <i>bla<sub>CTX-M-14</sub></i> , <i>qacE</i> , <i>sul1</i> , <i>df<sub>rA17</sub></i> , <i>catA1</i> , <i>tet(B)</i> and <i>aadA5</i>                                                         | Ding <i>et al.</i> (2018)*                                    |
| Chickens                                                  | 2015-2016 ( <i>mcr</i> -1)                   | 262                                      | <i>mcr</i> -1 (6 <i>E. coli</i> )                                               | -                                                                                               | IncY                                                                                | -                                                                                                                                                                                                                                                                          | Zhang <i>et al.</i> (2017)*                                   |
| Chickens                                                  | 2010-2014 ( <i>mcr</i> -1)                   | 981                                      | <i>mcr</i> -1 (45 <i>E. coli</i> )                                              | -                                                                                               | -                                                                                   | -                                                                                                                                                                                                                                                                          | Chen <i>et al.</i> (2017)*                                    |
| Chickens                                                  | 2007-2014 ( <i>mcr</i> -1)                   | 200                                      | <i>mcr</i> -1 (182 <i>E. coli</i> )                                             | -                                                                                               | -                                                                                   | -                                                                                                                                                                                                                                                                          | Huang <i>et al.</i> (2017)*                                   |
| Chickens, drinking water, slaughterhouse, and farm sewage | 2016 ( <i>mcr</i> -1)                        | 228                                      | <i>mcr</i> -1 (102 <i>E. coli</i> and 1 <i>Klebsiella pneumoniae</i> )          | ST156, ST6388, ST2736, ST155, ST206, ST224, ST156, ST2599, ST648, ST5498, ST162, ST354 and ST48 | IncHI2, IncI2 and IncFIB                                                            | <i>bla<sub>NDM-9</sub></i> , <i>bla<sub>NDM-5</sub></i> and <i>bla<sub>NDM-4</sub></i>                                                                                                                                                                                     | Wang <i>et al.</i> (2018)*                                    |

|                            |                                                                |      |                                                                                                                                                                                                                    |                                                                                                                                                                                                                                                                                |                               |                                                                                                                                                                                                                                                                                                                                                                                                                                                                                                                                                                             |                               |
|----------------------------|----------------------------------------------------------------|------|--------------------------------------------------------------------------------------------------------------------------------------------------------------------------------------------------------------------|--------------------------------------------------------------------------------------------------------------------------------------------------------------------------------------------------------------------------------------------------------------------------------|-------------------------------|-----------------------------------------------------------------------------------------------------------------------------------------------------------------------------------------------------------------------------------------------------------------------------------------------------------------------------------------------------------------------------------------------------------------------------------------------------------------------------------------------------------------------------------------------------------------------------|-------------------------------|
| Chickens                   | 2010-2015<br>( <i>mcr-1</i> )                                  | 1136 | <i>mcr-1</i> (58 <i>E. coli</i> ) and <i>mcr-1.3</i> (1 <i>E. coli</i> )                                                                                                                                           | ST48, ST10, ST616, ST88, ST77, ST542, ST5879, ST5865, ST1431, ST1290, ST873, ST971, ST952, ST5851, ST101, ST761, ST6050, ST351, ST361, ST744, ST117, ST3044, ST2491, ST2345, ST1642, ST5909, ST601, ST3944, ST870, ST3133, ST617, ST215, ST178, ST58, ST155, ST3481 and ST5542 | IncI2 (IS2)                   | <i>bla</i> <sub>CTX-M-1</sub> and <i>bla</i> <sub>CTX-M-9</sub>                                                                                                                                                                                                                                                                                                                                                                                                                                                                                                             | Yang <i>et al.</i> (2017)*    |
| Chickens and chicken meats | 2017<br>( <i>mcr-1</i> to <i>mcr-7</i> )                       | 3    | <i>mcr-3.15</i> and <i>mcr-3-like2</i> (1 <i>Aeromonas media</i> ), <i>mcr-3.16</i> and <i>mcr-3-like4</i> (1 <i>A. salmonicida</i> ), and <i>mcr-3.17</i> and <i>mcr-3-like3</i> (1 <i>A. allosaccharophila</i> ) | <i>ahh1</i>                                                                                                                                                                                                                                                                    | ISKpn3 and ISAs17             | <i>bla</i> <sub>OXA-10</sub> , <i>cmlA1</i> , <i>dfrA14</i> , <i>mph(A)</i> , <i>tet(E)</i> , <i>aadA1</i> , <i>bla</i> <sub>CEPH-A3-like</sub> , <i>bla</i> <sub>FOX-2</sub> , <i>bla</i> <sub>OXA-12</sub> , <i>dfrA17</i> , <i>sul1</i> and <i>tet(E)</i>                                                                                                                                                                                                                                                                                                                | Shen <i>et al.</i> (2018)***  |
| Chickens                   | 2015-2016<br>( <i>mcr-1</i> and <i>mcr-2</i> )                 | 443  | <i>mcr-1</i> (388 <i>E. coli</i> ) and <i>mcr-2</i> (66 <i>E. coli</i> ); <i>mcr-1</i> and <i>mcr-2</i> (32 <i>E. coli</i> )                                                                                       | -                                                                                                                                                                                                                                                                              | -                             | -                                                                                                                                                                                                                                                                                                                                                                                                                                                                                                                                                                           | Zhang <i>et al.</i> (2018)*   |
| Chickens                   | 2016<br>( <i>mcr-1-mcr-8</i> )                                 | 15   | <i>mcr-8.1</i> and <i>mcr-8.4</i> (2 <i>Raoultella ornithinolytica</i> )                                                                                                                                           | -                                                                                                                                                                                                                                                                              | IncFII (ΔIS903B)              | <i>aadA1</i> , <i>aph(3')-Ia</i> , <i>strA</i> , <i>strB</i> , <i>aac(6')-Ib</i> , <i>armA</i> , <i>fosA</i> , <i>mph(E)</i> , <i>floR</i> , <i>cml</i> , <i>qnrB4</i> , <i>sul</i> , <i>tet(B)</i> , <i>tet(34)</i> , <i>bla</i> <sub>TEM-1B</sub> , <i>bla</i> <sub>OXA-1</sub> , <i>bla</i> <sub>DHA-1</sub> , <i>aac(3)-IVa</i> , <i>aph(4)-Ia</i> , <i>aadA2</i> , <i>mph(A)</i> , <i>cat</i> , <i>qnrS4</i> , <i>oqxAB</i> , <i>qnrB52</i> , <i>sul1</i> , <i>sul2</i> , <i>sul3</i> , <i>tet(A)</i> , <i>tet(O)</i> , <i>tet(B)</i> and <i>bla</i> <sub>SHV-73</sub> | Wang <i>et al.</i> (2019)*    |
| Chickens                   | 2010-2015<br>( <i>mcr-1</i> to <i>mcr-5</i> and <i>mcr-7</i> ) | 10   | <i>mcr-1</i> (7 <i>K. pneumoniae</i> ) and <i>mcr-7</i> (3 <i>K. pneumoniae</i> )                                                                                                                                  | ST15                                                                                                                                                                                                                                                                           | IncI2                         | <i>mcr-7.1</i> strain: <i>bla</i> <sub>CTX-M-55</sub> ; <i>mcr-1</i> strain: <i>bla</i> <sub>SHV-28</sub> , <i>oqxAB</i> , <i>fosA</i> , <i>bla</i> <sub>CTX-M-55</sub> and <i>aph(3')-Ia</i>                                                                                                                                                                                                                                                                                                                                                                               | Yang <i>et al.</i> (2018)*    |
| Chickens and ducks         | 2015-2017                                                      | 1360 | <i>mcr-1.1</i> (170 <i>E. coli</i> ), <i>mcr-1.3</i> and                                                                                                                                                           | ST2732, ST2914, ST68, ST501,                                                                                                                                                                                                                                                   | IncI2, IncX4, IncFIB, IncFII, | <i>strA</i> , <i>strB</i> , <i>aph(3')-Ia</i> , <i>aac(3')-IIId</i> , <i>aac(3')-Iva</i> , <i>fosA3</i> ,                                                                                                                                                                                                                                                                                                                                                                                                                                                                   | Zhuge <i>et al.</i> (2019)*** |

|                          |                                         |                                             |                                                                                                                                                                                       |                                                                                                                                                                                                                                                                                                                                            |                                             |                                                                                                                                                                                                                                                                            |                              |
|--------------------------|-----------------------------------------|---------------------------------------------|---------------------------------------------------------------------------------------------------------------------------------------------------------------------------------------|--------------------------------------------------------------------------------------------------------------------------------------------------------------------------------------------------------------------------------------------------------------------------------------------------------------------------------------------|---------------------------------------------|----------------------------------------------------------------------------------------------------------------------------------------------------------------------------------------------------------------------------------------------------------------------------|------------------------------|
|                          | ( <i>mcr</i> -1 to <i>mcr</i> -5)       |                                             | <i>mcr</i> -1.7 (1 <i>E. coli</i> each)                                                                                                                                               | ST38, ST2085, ST117, ST10, ST1060, ST827, ST131, ST617, ST7153, ST48, ST93, ST58, ST2323, ST155, ST224, ST602, ST167, ST4214, ST302, ST216, ST34, ST540, ST227, ST3014, ST162, ST6257, ST410, ST452, ST3499, ST6484, ST1011, ST95, ST2171, ST648, ST457, ST29, ST294, ST723, ST109, ST678, ST17, ST62, ST3, ST5694, ST101, ST359 and ST127 | IncHI2A, IncB/O/K/Z, IncA/C and IncL/M      | <i>catA1</i> , <i>catB</i> , <i>cmlA1</i> , <i>floR</i> , <i>sul1</i> , <i>sul2</i> , <i>dfxR</i> , <i>tet(A)</i> , <i>tet(B)</i> , <i>tet(M)</i> , <i>oqxA</i> , <i>oqxB</i> , <i>qnrS</i> , <i>qnrA</i> , <i>qepA</i> , <i>qnr</i> , <i>aac(6')Ib-cr</i> and <i>qnrD</i> |                              |
| Chickens                 | 2014-2015 ( <i>mcr</i> -1)              | 120                                         | <i>mcr</i> -1 (70 <i>E. coli</i> )                                                                                                                                                    | ST10 and ST156                                                                                                                                                                                                                                                                                                                             | IncI                                        | <i>bla</i> <sub>NDM</sub>                                                                                                                                                                                                                                                  | Wang <i>et al.</i> (2017)*   |
| Ducks                    | 2017 ( <i>mcr</i> -3 and WGS)           | <i>mcr</i> -3 detected in 3 cloacal samples | <i>mcr</i> -3.10 (1 each of <i>Aeromonas caviae</i> , <i>E. coli</i> and <i>Proteus mirabilis</i> )                                                                                   | <i>E. coli</i> : ST457; <i>A. caviae</i> : ST513                                                                                                                                                                                                                                                                                           | IncI2 (IS <i>AsI3</i> and IS <i>Aeca6</i> ) | <i>E. coli</i> : <i>ant(6)-Ia</i> and <i>tet(D)</i>                                                                                                                                                                                                                        | Wang <i>et al.</i> (2018)*** |
| Chickens and environment | 2016 ( <i>mcr</i> -1)                   | 52                                          | <i>mcr</i> -1 (22 <i>E. coli</i> , 5 <i>Salmonella</i> , 1 <i>Providencia alcalifaciens</i> and 1 <i>Enterobacter cloacae</i> ) and <i>mcr</i> -1.3 (1 <i>Rauoltella planticola</i> ) | -                                                                                                                                                                                                                                                                                                                                          | IncX4 and IncI2 (IS <i>Apl1</i> )           | -                                                                                                                                                                                                                                                                          | Wang <i>et al.</i> (2018)*   |
| Chicken                  | 2016 ( <i>mcr</i> -1)                   | 1                                           | <i>mcr</i> -1 (1 <i>E. coli</i> )                                                                                                                                                     | ST457                                                                                                                                                                                                                                                                                                                                      | IncFIB, IncFII and IncI2                    | <i>bla</i> <sub>CTX-M-27</sub> , <i>aadA2</i> , <i>aph(3')-Ia</i> , <i>strA/B</i> , <i>rmtB</i> , <i>bla</i> <sub>TEM-1B</sub> , <i>fosA</i> , <i>mph(A)</i> , <i>erm(B)</i> , <i>floR</i> , <i>sul1</i> , <i>sul2</i> <i>tet(A)</i> and <i>dfxR12</i>                     | Zhang <i>et al.</i> (2019)*  |
| Chickens                 | 2013 ( <i>mcr</i> -1 and <i>mcr</i> -2) | 168                                         | <i>mcr</i> -1 (10 <i>E. coli</i> )                                                                                                                                                    | ST2018, ST37, ST117, ST359, ST155 and ST3489                                                                                                                                                                                                                                                                                               | IncI2                                       | <i>bla</i> <sub>CTX-M-15</sub> and <i>bla</i> <sub>SHV-11</sub>                                                                                                                                                                                                            | Wang <i>et al.</i> (2017)*   |
| Ducks                    | 2018 ( <i>mcr</i> -1)                   | 125                                         | <i>mcr</i> -1 (1 <i>Salmonella</i> )                                                                                                                                                  | ST399 and ST2529                                                                                                                                                                                                                                                                                                                           | IncX4 and IncHI2                            | <i>aph(6)-Id</i> , <i>aph(3'')-Ib</i> , <i>aac(6')-Iaa</i> ,                                                                                                                                                                                                               | Tang <i>et al.</i> (2020)*** |

|          |                                                 |     |                                            |                                                                                                                                                                                                                                                                                                                                                       |                                              |                                                                                                                                                                                                                                                                                                                                                                                                          |                                 |
|----------|-------------------------------------------------|-----|--------------------------------------------|-------------------------------------------------------------------------------------------------------------------------------------------------------------------------------------------------------------------------------------------------------------------------------------------------------------------------------------------------------|----------------------------------------------|----------------------------------------------------------------------------------------------------------------------------------------------------------------------------------------------------------------------------------------------------------------------------------------------------------------------------------------------------------------------------------------------------------|---------------------------------|
|          |                                                 |     | Goldcoast and 1<br><i>Salmonella</i> Ngor) |                                                                                                                                                                                                                                                                                                                                                       |                                              | <i>aadA2</i> , <i>aac(6')-Iaa</i> ,<br><i>aac(3)-IIa</i> , <i>aadA5</i> ,<br><i>aph(4)-Ia</i> , <i>aac(3)-IV</i> ,<br><i>aadA5</i> , <i>bla</i> <sub>CTX-M-55</sub> ,<br><i>bla</i> <sub>CTX-M-14</sub> , <i>floR</i> ,<br><i>sul1</i> , <i>sul2</i> , <i>drfA12</i> ,<br><i>dfx17</i> , <i>tet(A)</i> ,<br><i>oqx</i> <i>B</i> , <i>oqx</i> <i>A</i> , <i>qnrS1</i> ,<br><i>fosA3</i> and <i>mph(A)</i> |                                 |
| Chickens | 2008-2014<br>( <i>mcr</i> -to<br><i>mcr</i> -5) | 341 | <i>mcr</i> -1 (44 <i>E. coli</i> )         | ST1564,<br>ST1589,<br>ST3041,<br>ST1286,<br>ST648,<br>ST5229,<br>ST617, ST10,<br>ST29, ST46,<br>ST93, ST101,<br>ST156,<br>ST165,<br>ST354, ST533<br>and ST542                                                                                                                                                                                         | IncI2 (IS <i>Apl1</i> )                      | Tn6330, <i>bla</i> <sub>TEM-198</sub> ,<br><i>bla</i> <sub>TEM-1</sub> , <i>bla</i> <sub>CTX-M-55</sub> ,<br><i>bla</i> <sub>CTX-M-14</sub> , <i>bla</i> <sub>CTX-M-65</sub> ,<br><i>bla</i> <sub>CTX-M-15</sub> ,<br><i>bla</i> <sub>CTX-M-65</sub> , <i>bla</i> <sub>OXA-1</sub> ,<br><i>bla</i> <sub>OXA-10</sub> , <i>bla</i> <sub>TEM-141</sub><br>and <i>bla</i> <sub>CMY</sub>                    | Wu <i>et al.</i> (2018)*        |
| Ducks    | <i>mcr</i> -1 to<br><i>mcr</i> -8               | 45  | <i>mcr</i> -1.1 (35 <i>E. coli</i> )       | ST48,<br>ST7157,<br>ST10, ST220,<br>ST16, ST189,<br>ST226,<br>ST7454,<br>ST93,<br>ST2929,<br>ST2223,<br>ST162,<br>ST156,<br>ST1582,<br>ST155,<br>ST410,<br>ST1011,<br>ST5259,<br>ST648, ST354<br>and ST770                                                                                                                                            | IncHI2, IncI,<br>IncX4, IncP<br>and Incp0111 | <i>bla</i> <sub>TEM-1</sub>                                                                                                                                                                                                                                                                                                                                                                              | Shen <i>et al.</i> (2019)**     |
| Chickens | 2017-2018<br>( <i>mcr</i> -1)                   | 668 | <i>mcr</i> -1 (102 <i>E. coli</i> )        | ST1251,<br>ST219,<br>ST4710,<br>ST10,<br>ST4477,<br>ST93, ST423,<br>ST95, ST224,<br>ST168, ST48,<br>ST1011,<br>ST69, ST101,<br>ST38, ST43,<br>ST602,<br>ST4969,<br>ST206,<br>ST7584,<br>ST359,<br>ST8900,<br>ST156,<br>ST271,<br>ST359,<br>ST1286,ST47<br>53, ST4204,<br>ST354,<br>ST189,<br>ST1266,<br>ST2732,<br>ST4129,<br>ST648,ST617,<br>ST7108, | -                                            | <i>bla</i> <sub>TEM</sub> , <i>bla</i> <sub>CTX-M</sub> ,<br><i>bla</i> <sub>PSE</sub> , <i>bla</i> <sub>SHV</sub> ,<br><i>aac(6)-Ib-cr</i> and<br><i>qnrB</i>                                                                                                                                                                                                                                           | Zhao <i>et al.</i><br>(2020)*** |

|                                            |                                            |                                |                                                                                |                                                             |                                                                                                |                                                                                                                                                                                                                                                                                                                                                                                                                                                                                                     |                                                      |
|--------------------------------------------|--------------------------------------------|--------------------------------|--------------------------------------------------------------------------------|-------------------------------------------------------------|------------------------------------------------------------------------------------------------|-----------------------------------------------------------------------------------------------------------------------------------------------------------------------------------------------------------------------------------------------------------------------------------------------------------------------------------------------------------------------------------------------------------------------------------------------------------------------------------------------------|------------------------------------------------------|
|                                            |                                            |                                |                                                                                | ST2847 and ST297                                            |                                                                                                |                                                                                                                                                                                                                                                                                                                                                                                                                                                                                                     |                                                      |
| Chickens                                   | 2008 ( <i>mcr-1</i> to <i>mcr-9</i> )      | 55                             | <i>mcr-3.6</i> and <i>mcr-3</i> -like (1 <i>Aeromonas veronii</i> )            | ST514                                                       | ISAs2, ISAs20 and $\Delta$ 1ISAhy2 and $\Delta$ 2ISAhy2                                        | Tn6518, <i>bla</i> <sub>PER-3</sub> , <i>strA</i> , <i>strB</i> , <i>aac(6')Ib-cr</i> , <i>aacA4</i> , <i>mph(A)</i> , <i>catB3</i> , <i>sul1</i> and <i>tetE</i>                                                                                                                                                                                                                                                                                                                                   | Wang <i>et al.</i> (2020)*                           |
| Chickens and chicken slaughter environment | 2010-2019 ( <i>mcr-1</i> )                 | 721                            | <i>mcr-1.1</i> (10 GNB.)                                                       | -                                                           | -                                                                                              | -                                                                                                                                                                                                                                                                                                                                                                                                                                                                                                   | Fan <i>et al.</i> (2020)**                           |
| Chicken meat and egg                       | 2011-2016 ( <i>mcr-1</i> )                 | 2                              | <i>mcr-1</i> (1 <i>Salmonella</i> Indiana and 1 <i>Salmonella</i> Typhimurium) | ST 17 and ST34                                              | IncHI2 and IncI2; and chromosome                                                               | <i>bla</i> <sub>OXA-1</sub> , <i>bla</i> <sub>CTX-M-65</sub> , <i>bla</i> <sub>TEM-1B</sub> , <i>aac(3)-Iva</i> , <i>aph(4)-Ia</i> , <i>bla</i> <sub>CTX-M-14</sub> and <i>fosA3</i>                                                                                                                                                                                                                                                                                                                | Hu <i>et al.</i> (2019a)*; Hu <i>et al.</i> (2019b)* |
| Chickens                                   | 2017 ( <i>mcr-1</i> to <i>mcr-4</i> )      | 130                            | <i>mcr-1</i> (75 <i>E. coli</i> )                                              | -                                                           | -                                                                                              | <i>bla</i> <sub>TEM</sub> , <i>bla</i> <sub>CTX-M</sub> , <i>aphA3</i> , <i>tetA</i> , <i>tetB</i> , <i>tetC</i> , <i>sul1</i> and <i>sul2</i>                                                                                                                                                                                                                                                                                                                                                      | Song <i>et al.</i> (2020)***                         |
| Chicken                                    | 2019 ( <i>mcr-1</i> to <i>mcr-8</i> )      | 1 <i>Klebsiella pneumoniae</i> | <i>mcr-8.2</i> (1 <i>Klebsiella pneumoniae</i> )                               | ST395                                                       | IncFIB (K) (ISEc11, IS903B and ISKpn26                                                         | <i>floR</i> , <i>sul1</i> , <i>aac(6')-Ib-cr</i> , <i>aadA16</i> , <i>aadA2</i> , <i>aph(3')-Ia</i> , <i>bla</i> <sub>CTX-M-27</sub> , <i>bla</i> <sub>DHA-1</sub> , <i>mph(A)</i> , <i>tet(D)</i> , <i>dfrA12</i> , <i>dfrA27</i> , <i>aac(6')-Ib-cr</i> and <i>qnrB4</i>                                                                                                                                                                                                                          | Yang <i>et al.</i> (2020)***                         |
| Chickens                                   | 2019 ( <i>mcr-1</i> to <i>mcr-10</i> )     |                                | <i>mcr-8</i> (16 <i>K. pneumoniae</i> )                                        | ST37 and ST3332                                             | IncFIB/IncFII, IncFIA/IncFI B, IncHIIB and IncFIB/IncHI1 B                                     | <i>tmexCD1-toprJ1</i> , <i>bla</i> <sub>CTX-M-27</sub> , <i>bla</i> <sub>DHA-1</sub> , <i>bla</i> <sub>SHV-11/12</sub> , <i>bla</i> <sub>TEM-1B</sub> , <i>floR</i> , <i>fosA</i> , <i>ogxA</i> , <i>tet(A)</i> , <i>dfrA27</i> , <i>sul1</i> , <i>sul3</i> , <i>rmtB</i> , <i>aac(6')Ib</i> , <i>aadA</i> , <i>ant(2'')-Ia</i> , <i>aph(3'')-Ib</i> , <i>aph(6)-Id</i> , <i>qnrB4</i>                                                                                                              | Wang X <i>et al.</i> (2022)***                       |
| Chicken                                    | <i>mcr-1</i> to <i>mcr-10</i>              | 1                              | <i>mcr-1</i> (1 <i>E. fergusonii</i> )                                         | -                                                           | -                                                                                              | <i>bla</i> <sub>TEM-1A</sub> , <i>bla</i> <sub>CTX-M-65</sub> , <i>bla</i> <sub>OXA-1</sub> , <i>bla</i> <sub>TEM-1B</sub> , <i>bla</i> <sub>CTX-M-55</sub> , <i>aac(3)-IIId</i> , <i>aph(3')-Ia</i> , <i>aph(3')-Ib</i> , <i>aph(6)-Id</i> , <i>rmtB</i> , <i>aac(6')-Ib-cr</i> , <i>aadA2</i> , <i>qnrS2</i> , <i>ogxA</i> , <i>ogxB</i> , <i>fosA</i> , <i>mph(A)</i> , <i>floR</i> , <i>catA1</i> , <i>catB3</i> , <i>arr-3</i> , <i>sul1</i> , <i>sul2</i> , <i>dfrA12</i> , and <i>tet(A)</i> | Tang B <i>et al.</i> (2020a)***                      |
| Chickens                                   | 2010-2011 ( <i>mcr-1</i> to <i>mcr-9</i> ) | 210 <i>E. coli</i>             | <i>mcr-1</i> (77 <i>E. coli</i> )                                              | (A, B1, B2 and D) <i>aafII</i> , <i>eae</i> and <i>stx1</i> | IncHI2, IncFrep, IncFIC, IncX4, IncFIA, IncP, IncN, IncY and IncA/C (ISEcp1, ISCR1 and ISAp11) | <i>bla</i> <sub>TEM</sub> , <i>bla</i> <sub>SHV</sub> , <i>bla</i> <sub>CTX-M-1</sub> , <i>bla</i> <sub>CTX-M-9</sub> , <i>bla</i> <sub>CTX-M-55</sub> , <i>bla</i> <sub>CTX-M-14</sub> , <i>bla</i> <sub>CTX-M-15</sub> , <i>bla</i> <sub>CTX-M-28</sub> , <i>bla</i> <sub>CTX-M-66</sub> and integrons                                                                                                                                                                                            | Shafiq M. <i>et al.</i> (2021)*                      |
| Chickens and ducks                         | 2019 ( <i>mcr-1</i> to <i>mcr-10</i> )     | 104 <i>E. fergusonii</i>       | <i>mcr-1</i> (24 <i>E. fergusonii</i> ) from chickens and ducks                |                                                             | IncI2, IncHI2 and IncHI2A (ISAp11)                                                             | <i>bla</i> <sub>TEM-1B</sub> , <i>floR</i> , <i>bla</i> <sub>CTX-M-65</sub> , <i>bla</i> <sub>OXA-10</sub> , <i>bla</i> <sub>CTX-M-3</sub> , <i>bla</i> <sub>TEM-1A</sub> , <i>fosA3</i> , <i>bla</i> <sub>CTX-M-137</sub> , <i>bla</i> <sub>CTX-M-14</sub> , <i>bla</i> <sub>CTX-M-55</sub> and mutation in <i>gyrA</i>                                                                                                                                                                            | Tang B. <i>et al.</i> (2020b)***                     |

|                                    |                                                |                               |                                                                               |                                                                                                                                                                        |                                                         |                                                                                                                                                                                                                                                                                                                 |                          |
|------------------------------------|------------------------------------------------|-------------------------------|-------------------------------------------------------------------------------|------------------------------------------------------------------------------------------------------------------------------------------------------------------------|---------------------------------------------------------|-----------------------------------------------------------------------------------------------------------------------------------------------------------------------------------------------------------------------------------------------------------------------------------------------------------------|--------------------------|
| Ducks                              | 2020-2021<br>( <i>mcr-1</i> to <i>mcr-10</i> ) | 54 <i>E. fergusonii</i>       | <i>mcr-1</i> (4 <i>E. fergusonii</i> )                                        | <i>gad</i> , <i>ireA</i> , <i>iss</i> , <i>iucC</i> , <i>iutA</i> , <i>papA20</i> , <i>papC</i> , <i>terC</i> , <i>traT</i> and <i>Irea</i>                            | IncI2                                                   | <i>aac(3)-IV</i> , <i>aadA1</i> , <i>aadA2B</i> , <i>aph(3)-Ib</i> , <i>aph(4)-Ia</i> , <i>aph(6)-Id</i> , <i>bla<sub>OXA-10</sub></i> , <i>qnrS1</i> , <i>lnu(F)</i> , <i>cmlA1</i> , <i>floR</i> , <i>arr-2</i> , <i>sul2</i> , <i>sul3</i> , <i>dfrA14</i> , <i>tet(A)</i> and <i>tet(B)</i>                 | Lin J et al. (2022)***   |
| Chicken meat                       | 2017<br>( <i>mcr-1</i> to <i>mcr-10</i> )      | 2                             | <i>mcr-1</i> (2 <i>E. coli</i> )                                              | ST83 and ST21                                                                                                                                                          | IncHI2 and IncI2 (IS26s; IS186B and class one integron) | <i>bla<sub>NDM-5</sub></i> , <i>mph(A)</i> , <i>tet(M)</i> , <i>floR</i> and <i>aph(39)-Ia</i>                                                                                                                                                                                                                  | Liu X. et al. (2021)***  |
| Chickens                           | 2016-2018<br>( <i>mcr-1</i> to <i>mcr-9</i> )  | 37                            | <i>mcr-1</i> (12 <i>E. coli</i> )                                             | ST10, ST206, ST48, ST155, ST542, ST2539, ST196, ST90, ST2253, ST871, ST73, ST4976, ST3494, ST641, ST410, ST1147, and ST1141. STs of chicken strains were not indicated | -                                                       | <i>bla<sub>SHV</sub></i> , <i>aac(6')-Ib-cr</i> , <i>qepA</i> , <i>qnrS</i> , <i>oqxA</i> , <i>oqxS</i> , <i>sul1</i> , <i>sul2</i> , <i>sul3</i> , <i>bla<sub>TEM</sub></i> , <i>bla<sub>CTX-M</sub></i> , <i>aacC2</i> , <i>aacC4</i> , <i>strA</i> , <i>tetA</i> , <i>tetB</i> , <i>tetC</i> and <i>floR</i> | Li F. et al. (2022)*     |
| Eggs and pickled ready-to-eat meat | 2007-2016<br>( <i>mcr-9</i> )                  | 2027 <i>Salmonella</i>        | <i>mcr-9</i> (127 <i>Salmonella</i> )                                         | -                                                                                                                                                                      | -                                                       | <i>bla<sub>TEM-1</sub></i> and <i>bla<sub>CTX-M-3</sub></i>                                                                                                                                                                                                                                                     | Sheng et al. (2022)*     |
| Chicken and duck meats             | 2017<br>( <i>mcr-1</i> to <i>mcr-10</i> )      | <i>Salmonella</i>             | <i>mcr-1.1</i> (1 <i>Salmonella</i> ) and <i>mcr-9</i> (4 <i>Salmonella</i> ) | <i>fimD</i> and <i>pefC</i>                                                                                                                                            | IncX4 and IncI, IncHI2A                                 | <i>aac(6')-Iaa</i> , <i>aph(300)-Ib</i> , <i>bla<sub>TEM-1</sub></i> and <i>sul2</i>                                                                                                                                                                                                                            | Lyu et al. (2021)***     |
| Chicken meats                      | 2015-2017<br>( <i>mcr-1</i> to <i>mcr-4</i> )  | 315 <i>E. coli</i>            | <i>mcr-1</i> (34 <i>E. coli</i> )                                             | =                                                                                                                                                                      | IncI2 and IncHI2                                        | <i>bla<sub>NDM-1</sub></i>                                                                                                                                                                                                                                                                                      | Liu X. et al. (2019)***  |
| Chickens and ducks                 | (2017)<br><i>mcr-1</i>                         | 27 <i>E. coli</i>             | <i>mcr-1</i> (27 <i>E. coli</i> )                                             | ST767, ST155, ST457, ST48, ST4204, ST533, ST1638, ST101, ST6395, ST4408, ST1968, ST117 and ST156                                                                       | -                                                       | <i>bla<sub>CTX-M-14</sub></i> , <i>bla<sub>CTX-M-15</sub></i> , <i>bla<sub>TEM-1</sub></i>                                                                                                                                                                                                                      | Li X. et al. (2020)***   |
| Chickens                           | <i>mcr-1</i>                                   | 78 <i>E. coli</i>             | <i>mcr-1</i> (53 <i>E. coli</i> )                                             | ST297, ST156, ST2973, ST2847, ST117, ST101, ST617, ST10, ST1011 and ST2944                                                                                             | IncI2 and IncHI2/ST3-type                               | <i>bla<sub>CTX-M9G</sub></i> , <i>bla<sub>CTX-M1G</sub></i> , <i>rmtB</i> , <i>bla<sub>NDM-5</sub></i> , <i>bla<sub>NDM-1</sub></i> , <i>floR</i> and <i>fosA3</i>                                                                                                                                              | Liu B-T et al. (2017)*** |
| Geese                              | 2017<br>( <i>mcr-1</i> to <i>mcr-10</i> )      | 162 <i>Enterobacteriaceae</i> | <i>mcr-1</i> (1 <i>E. coli</i> )                                              | -                                                                                                                                                                      | Chromosomal <i>mcr-1</i>                                | <i>qnrS1</i> , <i>bla<sub>TEM-1B</sub></i> , <i>aph(6)-Id</i> , <i>aph(3')-Ib</i> , <i>sul2</i> , <i>dfrA14</i> , <i>floR</i> and <i>tet(A)</i> (IS <i>AplI</i> )                                                                                                                                               | Lu X et al. (2019)***    |
| Chicken and chicken                | 2019-2020                                      | 690 samples                   | <i>mcr-1</i> (17 <i>E. coli</i> )                                             | ST10338, ST1403, ST1421,                                                                                                                                               | -                                                       | <i>bla<sub>CTX</sub></i> , <i>bla<sub>OXA</sub></i> , <i>bla<sub>TEM</sub></i> , <i>bla<sub>TEM-122</sub></i> , <i>tet(A)</i> , <i>floR</i> , <i>qnrS1</i> ,                                                                                                                                                    | Hu et al. (2022)***      |

|                                                                         |                                             |                              |                                                                                                                                                                 |                                                                                                                                                                                                                                                                                                                                                         |                           |                                                                                                                                                                                                                                                                                                                                                                                                                                                                                                                                                                                                                                                                                                                                                                                                                                        |                         |
|-------------------------------------------------------------------------|---------------------------------------------|------------------------------|-----------------------------------------------------------------------------------------------------------------------------------------------------------------|---------------------------------------------------------------------------------------------------------------------------------------------------------------------------------------------------------------------------------------------------------------------------------------------------------------------------------------------------------|---------------------------|----------------------------------------------------------------------------------------------------------------------------------------------------------------------------------------------------------------------------------------------------------------------------------------------------------------------------------------------------------------------------------------------------------------------------------------------------------------------------------------------------------------------------------------------------------------------------------------------------------------------------------------------------------------------------------------------------------------------------------------------------------------------------------------------------------------------------------------|-------------------------|
| farm environment (water, litter and soil) and flies in farm environment | ( <i>mcr-1</i> to <i>mcr-10</i> )           |                              |                                                                                                                                                                 | ST156, ST162, ST3941, ST6321, ST69, ST7153, ST93, and ST12735 (A, B1 and D)                                                                                                                                                                                                                                                                             |                           | <i>dfrA10</i> , <i>dfrA14</i> and <i>sul1</i>                                                                                                                                                                                                                                                                                                                                                                                                                                                                                                                                                                                                                                                                                                                                                                                          |                         |
| Live poultry markets                                                    | 2015-2017 ( <i>mcr-1</i> to <i>mcr-9</i> )  | 926 <i>E. coli</i>           | <i>mcr-1</i> (157 <i>E. coli</i> )                                                                                                                              | ST362, 117, 2944, ( <i>KpsM II</i> , <i>iutA</i> and <i>papA</i> )                                                                                                                                                                                                                                                                                      | -                         | <i>bla</i> <sub>CTX-M-9G</sub> , <i>fosA3</i> , <i>rmtB</i> , <i>floR</i> , <i>bla</i> <sub>NDM-5</sub> , <i>bla</i> <sub>CTX-M-1G</sub> and <i>oqxAB</i>                                                                                                                                                                                                                                                                                                                                                                                                                                                                                                                                                                                                                                                                              | Zou et al. (2021)**     |
| Chickens, slaughterhouse workers and people nearby                      | 2019 ( <i>mcr-10</i> )                      | 200 <i>Enterobacteriales</i> | <i>mcr-10.1</i> and <i>mcr-8</i> (2 <i>K. pneumoniae</i> from chicken, 1 <i>E. coli</i> from slaughterhouse and 1 <i>Enterobacter kobei</i> from nearby person) | ST216; <i>K. pneumoniae</i> : ST11 <i>Enterobacter</i> : ST1605,                                                                                                                                                                                                                                                                                        | IncFIB, IncFII and IncFIA | <i>Klebsiella</i> : <i>bla</i> <sub>ACT-9</sub> , <i>aph(3)-Ib</i> , <i>aph(6)-Ib</i> , <i>aadA16</i> , <i>aac(3)-IIId</i> , <i>aac(6)-Ib-cr</i> , <i>arr-3</i> , <i>mph(A)</i> , <i>dfrA27</i> , <i>sul1</i> , <i>sul2</i> , <i>tet(A)</i> , <i>qacE</i> , <i>qnrB52</i> , <i>bla</i> <sub>TEM-1B</sub> , <i>floR</i> , <i>qnrS1</i> , <i>bla</i> <sub>CTX-M-15</sub> , <i>bla</i> <sub>TEM-1B</sub> , <i>aph(39)-Ia</i> , <i>aph(39)-Ib</i> , <i>aph(39)-IIId</i> , <i>aadA16</i> , <i>aph(6)-Id</i> , <i>aph(6)-Id-cr</i> , <i>tet(A)</i> , <i>mph(A)</i> , <i>aac(69)-Ibcr</i> , <i>dfrA27</i> , <i>msr(E)</i> , <i>mph(E)</i> , <i>qacE</i> , <i>cmlA1</i> , <i>qnrB52</i> , <i>sul1</i> , <i>tet(A)</i> , <i>bla</i> <sub>TEM-1B</sub> , <i>floR</i> , <i>fosA</i> , <i>oqxA</i> , <i>oqxB</i> and <i>bla</i> <sub>SHV-182</sub> | Xu et al. (2022)***     |
| Chickens                                                                | 2016-2019 ( <i>mcr-1</i> to <i>mcr-10</i> ) | 53 samples                   | <i>mcr-1</i> (10 <i>E. coli</i> )                                                                                                                               | ST156, ST5454 and ST602 ( <i>cvaC</i> , <i>etsC</i> , <i>hlyF</i> , <i>iroN</i> , <i>iss</i> , <i>iucC</i> , <i>iutA</i> , <i>mchF</i> , <i>ompT</i> , <i>sitA</i> , <i>traT</i> , <i>gad</i> , <i>hra</i> , <i>lpfA</i> , <i>papA</i> , <i>F19</i> , <i>terC</i> , <i>astA</i> , <i>gad</i> , <i>lpfA</i> , <i>papC</i> , <i>terC</i> and <i>cma</i> ) | IncX4 and IncI2           | <i>bla</i> <sub>TEM-1B</sub> , <i>mdf(A)</i> , <i>gytA</i> , <i>aadA2</i> , <i>aac(3)-IIId</i> , <i>aph(3')-Ia</i> , <i>oqxA</i> , <i>oqxB</i> , <i>dfrA12</i> , <i>sitABCD</i> , <i>mph(A)</i> , <i>bla</i> <sub>CTX-M-55</sub> , <i>aph(6)-Id</i> , <i>aph(3'')-Ib</i> , <i>tet(A)</i> , <i>sul2</i> , <i>floR</i> , <i>fosA3</i> , <i>bla</i> <sub>NDM-5</sub> , <i>aadA1</i> , <i>dfrA1</i> , <i>fosA7</i> , <i>mdf(A)</i> , <i>dfrA17</i> and mutation in <i>gyrA</i>                                                                                                                                                                                                                                                                                                                                                             | Liu Z et al. (2021)**   |
| Chickens                                                                | <i>mcr-1</i> to <i>mcr-10</i>               | 8                            | <i>mcr-1</i> (4 <i>E. coli</i> )                                                                                                                                | ST189 ( <i>gad</i> )                                                                                                                                                                                                                                                                                                                                    | IncX3                     | <i>bla</i> <sub>CTX-M-65</sub> , <i>bla</i> <sub>OXA-10</sub> , <i>bla</i> <sub>NDM-5</sub> , <i>bla</i> <sub>CTX-M-65</sub> , <i>bla</i> <sub>OXA-10</sub> , <i>aph(4)-Ia</i> , <i>aac(3)-IVa</i> , <i>fosA</i> , <i>aac(6')-Ib-cr</i> , <i>aph(3')-Ia</i> and <i>mph(A)</i>                                                                                                                                                                                                                                                                                                                                                                                                                                                                                                                                                          | Liu Z. et al. (2022)    |
| Chickens                                                                | 1970-2019 ( <i>mcr-1</i> to <i>mcr-10</i> ) | 567 <i>E. coli</i>           | <i>mcr-1</i> (251 <i>E. coli</i> )                                                                                                                              | Many up to 21                                                                                                                                                                                                                                                                                                                                           | NA                        | <i>aac(3)-IIa</i> , <i>aac(3)-Iva</i> , <i>aac(6')-Ib-cr</i> , <i>aph(3'')-Ia</i> , <i>aadA</i> , <i>aadA5</i> , <i>aph(4)-Ia</i> , <i>qnrS</i> , <i>aphA2</i> , <i>oqxB</i> , <i>oqxA</i> , <i>erm(B)</i> , <i>erm(C)</i> , <i>lnu(F)</i> , <i>mph(A)</i> , <i>bla</i> <sub>CTX-M-1</sub> , <i>bla</i> <sub>CTX-M-9</sub> , <i>bla</i> <sub>NDM-1</sub> , <i>bla</i> <sub>OXA-1</sub> , <i>bla</i> <sub>CMY</sub> ,                                                                                                                                                                                                                                                                                                                                                                                                                   | Yang L. et al. (2022)** |

|             |                                            |                       |                                                                                                                 |                                                                                                                                                                                               |                                                                            |                                                                                                                                                                                                                                                                                                                                                                                      |                           |
|-------------|--------------------------------------------|-----------------------|-----------------------------------------------------------------------------------------------------------------|-----------------------------------------------------------------------------------------------------------------------------------------------------------------------------------------------|----------------------------------------------------------------------------|--------------------------------------------------------------------------------------------------------------------------------------------------------------------------------------------------------------------------------------------------------------------------------------------------------------------------------------------------------------------------------------|---------------------------|
|             |                                            |                       |                                                                                                                 |                                                                                                                                                                                               |                                                                            | <i>bla</i> <sub>TEM-1D</sub> , <i>ampC2</i> , <i>ampC1</i> , <i>strB</i> , <i>strA</i> , <i>sat2a</i> , <i>rmtB</i> , <i>fosA</i> , <i>catA1</i> , <i>catB3</i> , <i>cmlA</i> , <i>floR</i> , <i>arr</i> , <i>sul1</i> , <i>sul2</i> , <i>sul3</i> , <i>tet(A)</i> , <i>tet(B)</i> , <i>tet(M)</i> , <i>dfrA1</i> , <i>dfrA27</i> , <i>dfrA5</i> , <i>dfrA7</i> and <i>dfrA12</i>    |                           |
| Pigeons     | <i>mcr-1</i> to <i>mcr-10</i>              | 3                     | <i>mcr-1</i> (3 <i>E. coli</i> )                                                                                | ST6775 ( <i>gad</i> , <i>neuC</i> , <i>terC</i> and <i>traT</i> )                                                                                                                             | Chromosomal <i>mcr-1</i> , (Tn633)                                         | <i>bla</i> <sub>NDM-5</sub> , <i>tet(X4)</i> , <i>aadA1</i> , <i>aadA2</i> , <i>aph(39)-Ia</i> , <i>aac(3)-IIa</i> , <i>floR</i> , <i>cmlA1</i> , <i>mdf(A)</i> , <i>tet(A)</i> , <i>sul2</i> , <i>sul3</i> , <i>dfrA12</i> , <i>erm(42)</i> , and <i>mef(B)</i>                                                                                                                     | Lu X et al. (2022)***     |
| Chickens    | 2013-2016 ( <i>mcr-8</i> )                 | 26                    | <i>mcr-8.1</i> and novel <i>mcr-8.5</i> (7 <i>K. pneumoniae</i> ) and <i>mcr-3.11</i> (1 <i>K. pneumoniae</i> ) | ST37                                                                                                                                                                                          | IncFIA, IncFII(K), IncFII and IncFIB ( <i>ISAp11</i> )                     | <i>tmexCD1-toprJ</i>                                                                                                                                                                                                                                                                                                                                                                 | S. Sun et al. (2020)*     |
| Chicken     |                                            |                       | novel <i>mcr-8</i> ( <i>K. pneumoniae</i> )                                                                     |                                                                                                                                                                                               |                                                                            |                                                                                                                                                                                                                                                                                                                                                                                      | Wang et al. (2018)        |
| Chickens    | 2013 ( <i>mcr-1</i> )                      | 58                    | <i>mcr-1</i> (53 <i>E. coli</i> )                                                                               |                                                                                                                                                                                               | IncHI2 and IncI2 ( <i>ISAp11</i> )                                         | <i>bla</i> <sub>CTX-M-14</sub> , <i>bla</i> <sub>CTX-M-64</sub> , <i>fosA3</i> , <i>bla</i> <sub>CTX-M-55</sub> , <i>bla</i> <sub>CTX-M-65</sub> , <i>floR</i> , <i>bla</i> <sub>CTX-M-82b</sub> and <i>rmtB</i>                                                                                                                                                                     | Cao et al. (2020)*        |
| Chicken     | 2016 ( <i>mcr-1</i> to <i>mcr-10</i> )     | 1                     | <i>mcr-1</i> (1 <i>E. coli</i> )                                                                                | ST93                                                                                                                                                                                          | IncI2                                                                      | <i>bla</i> <sub>CTX-M-55</sub> , <i>bla</i> <sub>TEM-1b</sub> , <i>rmtB</i> , <i>bla</i> <sub>CTX-M-14</sub> , <i>fosA3</i> , <i>floR</i> , <i>cmlA1</i> , <i>aac(3)-IVa</i> , <i>Δaac(3)-IIa</i> , <i>aph(4)-Ia</i> , <i>aph(3')-Ia</i> , <i>ant(3'')-Ia</i> , <i>ant(3'') family</i> , <i>sul2</i> , <i>sul3</i> , <i>dfrA12</i> , <i>qacL</i> , <i>mef(B)</i> , and <i>lnu(F)</i> | Li et al. (2021)*         |
| Chicken egg | 2016 ( <i>mcr-1</i> )                      | 755 <i>Salmonella</i> | <i>mcr-1.19</i> (1 <i>S. Typhimurium</i> )                                                                      | ST34                                                                                                                                                                                          | IncHI2 ( <i>ISAp11</i> )                                                   | <i>bla</i> <sub>TEM-1B</sub> , <i>bla</i> <sub>CTX-M-14</sub> , <i>fosA3</i> and mutation in <i>gyrA</i>                                                                                                                                                                                                                                                                             | Hu et al. (2021)*         |
| Chicken     | 2019                                       | 1                     | <i>mcr-10.1</i> ( <i>Enterobacter rogenkampii</i> )                                                             | ST1056                                                                                                                                                                                        | IncFII                                                                     | <i>bla</i> <sub>MIR</sub> and <i>fosA</i>                                                                                                                                                                                                                                                                                                                                            | Lei et al. (2021)***      |
| Chickens    | 2014-2019 ( <i>mcr-1</i> to <i>mcr-4</i> ) | 131                   | <i>mcr-1</i> (51 <i>E. coli</i> )                                                                               | ST696, ST162, ST156, ST10, ST226, ST3519, ST359, ST2179, ST124, ST48, ST6706, ST175, ST6740, ST65, ST189, ST1296, ST4935, ST612, ST171, ST7115, ST117, ST1158, ST2732, ST354, ST82 and ST7189 | IncN, IncHI2, IncI1, IncFIB, IncP, IncX4, IncY, IncFrep, IncX2, and IncFIA | -                                                                                                                                                                                                                                                                                                                                                                                    | Zhang W. et al. (2022)*** |



|                               |                                                  |                         |                                                  |                                                                                                                                                                                                                            |                                                                            |                                                                                                                                                                                                                                                                                                                                                                                                                              |                              |
|-------------------------------|--------------------------------------------------|-------------------------|--------------------------------------------------|----------------------------------------------------------------------------------------------------------------------------------------------------------------------------------------------------------------------------|----------------------------------------------------------------------------|------------------------------------------------------------------------------------------------------------------------------------------------------------------------------------------------------------------------------------------------------------------------------------------------------------------------------------------------------------------------------------------------------------------------------|------------------------------|
| Geese                         | <i>mcr-1</i> to <i>mcr-10</i>                    | 33 <i>K. pneumoniae</i> | <i>mcr-1</i> (1 <i>K. pneumoniae</i> )           | <i>entB</i> , <i>C</i> , <i>E</i> , <i>F</i> , <i>S</i> , <i>acrB</i> , <i>fepA</i> , <i>D</i> , <i>G</i> , <i>etsC</i> , <i>altB</i> , <i>ompA</i> , <i>gndA</i> , <i>galF</i> , <i>rpos</i> , <i>ugD</i> and <i>rfbK</i> | -                                                                          | <i>bla</i> <sub>NDM-5</sub> , <i>bla</i> <sub>CTX-M</sub> , <i>aad</i> , <i>oqx</i> <i>B</i> and <i>tet</i>                                                                                                                                                                                                                                                                                                                  | Bai <i>et al.</i> (2022)     |
| Poultry meat                  | <i>mcr-1</i> to <i>mcr-10</i>                    | 2                       | <i>mcr-1</i> (1 <i>E. coli</i> )                 | -                                                                                                                                                                                                                          | IncHI                                                                      | <i>bla</i> <sub>OXA-1</sub> , <i>bla</i> <sub>CTX-M-65</sub> , <i>bla</i> <sub>TEM-1B</sub> , <i>aac</i> (3)-IV, <i>aadA22</i> , <i>tet</i> (A), <i>tet</i> (M), <i>catB3</i> , <i>floR</i> , <i>sul1</i> , <i>sul2</i> , <i>aac</i> (6')-Ib-cr, <i>oqx</i> <i>A</i> , <i>oqx</i> <i>B</i> and <i>qnrS2</i>                                                                                                                  | Wang <i>et al.</i> (2022)    |
| Pigeons                       | 2017 and above ( <i>Mcr-1</i> to <i>mcr-10</i> ) | 100                     | <i>mcr-1</i> (45 <i>E. fergusonii</i> )          | ST646, ST155, ST38, ST224, ST8024, ST7153, ST939, ST648, ST2351, ST6164 and ST6775                                                                                                                                         | IncX4, IncI2, IncI1, IncHI1, IncY, IncFIB, IncF, IncN                      | <i>tet</i> (X4)                                                                                                                                                                                                                                                                                                                                                                                                              | Lu <i>et al.</i> (2023)      |
| Ducks and geese               | 2019-2020 ( <i>mcr-1</i> to <i>mcr-10</i> )      |                         | <i>mcr-1</i> (57 <i>E. coli</i> )                | -                                                                                                                                                                                                                          | IncHI2, IncX4, IncI2, IncFIB, IncFIA, IncFIC, IncFII and IncHI2A           | <i>bla</i> <sub>CTX-M-55</sub> , <i>bla</i> <sub>CTX-M-65</sub> , <i>bla</i> <sub>TEM-1</sub> , <i>bla</i> <sub>OXA-10</sub> , <i>bla</i> <sub>OXA-1</sub> , <i>bla</i> <sub>CTX-M-123</sub> , <i>fosA3</i> , <i>floR</i> , <i>tet</i> (A) and <i>bla</i> <sub>TEM-1</sub>                                                                                                                                                   | Hu <i>et al.</i> (2022)***   |
| Poultry birds and farmworkers | 2019 ( <i>mcr-1</i> to <i>mcr-10</i> )           | 5                       | <i>mcr-8.1</i> (3 <i>Klebsiella pneumoniae</i> ) | <i>fim</i> ABCDEFGH, <i>HI</i> , <i>mrk</i> ABCDFHI, <i>J</i> , <i>ent</i> ABCDEF, <i>fep</i> ABCDG and <i>iroE</i>                                                                                                        | IncFII(pKP91)/IncFIA(HI1)                                                  | <i>bla</i> <sub>NDM-5</sub> , <i>armA</i> , <i>bla</i> <sub>TEM-1B</sub> , <i>bla</i> <sub>CTX-M-1</sub> , <i>bleO</i> , <i>oqx</i> <i>AB</i> <i>qnrS</i> , <i>qnrB</i> , <i>aac</i> (6')-Ib-cr, <i>gyrA</i> and <i>parC</i>                                                                                                                                                                                                 | Yang <i>et al.</i> (2022)*** |
| Chicken eggs                  | 2017-2022 ( <i>mcr-1</i> to <i>mcr-10</i> )      | 22                      | <i>mcr-1</i> (7 <i>Salmonella</i> )              | -                                                                                                                                                                                                                          | -                                                                          | <i>aph</i> (4)-Ia, <i>aac</i> (3)-IV, <i>aph</i> (6)-Id, <i>aac</i> (60)-Iaa, <i>aph</i> (3'')-Ib, <i>bla</i> <sub>OXA-1</sub> , <i>bla</i> <sub>TEM-1B</sub> , <i>aac</i> (6')-Ib-cr and <i>gyrA</i> <i>catB3</i> , <i>arr-3</i> , <i>sul1</i> , <i>sul2</i> , <i>aph</i> (30)-Ia, <i>aadA1</i> , <i>aadA2b</i> , <i>sul3</i> , <i>oqx</i> <i>AB</i> , <i>floR</i> , <i>dfrA12</i> , <i>cmlA1</i> and <i>terYXWZ</i> ABCDEF | Li <i>et al.</i> (2022)***   |
| Chickens                      | 2020-2021 ( <i>mcr-1</i> to <i>mcr-10</i> )      | 54                      | <i>mcr-1</i> (4 <i>E. fergusonii</i> )           | <i>gad</i> , <i>ireA</i> , <i>iss</i> , <i>iucC</i> , <i>terC</i> , <i>traT</i> , <i>iutA</i> and <i>papA</i>                                                                                                              | IncI2 (IS <i>Apl1</i> , IS609, IS683, IS200 and IS <i>Ecp1</i> and IS2)    | <i>bla</i> <sub>OXA-10</sub> , <i>qnrS1</i> , <i>lnu</i> (F), <i>cmlA1</i> , <i>floR</i> , <i>ARR-2</i> , <i>sul2</i> , <i>sul3</i> , <i>dfrA14</i> , <i>tet</i> (A) and <i>tet</i> (B)                                                                                                                                                                                                                                      | Lin <i>et al.</i> (2023)***  |
| Chicken meats                 | 2019-2021 ( <i>mcr-1</i> to <i>mcr-10</i> )      | 455                     | <i>mcr-1</i> (7 <i>Salmonella</i> Indiana)       |                                                                                                                                                                                                                            | IncN1-IncHI2 and IncX4 (IS26, IS1, IS4321, IS1006, ISCR2, IS <i>Aba1</i> , | <i>aph</i> (4)-Ia, <i>aphA1</i> , <i>aac</i> (3)-IVa, <i>aadA1</i> , <i>aadA2</i> , <i>aadA5</i> , <i>cmlA1</i> , <i>floR</i> , <i>oqx</i> <i>AB</i> , <i>sul2</i> , <i>sul3</i> , <i>mph</i> (A), <i>dfrA17</i> , <i>terYXWZ</i> ABCDEF                                                                                                                                                                                     | Mei <i>et al.</i> (2023)***  |

|          |                                                        |     |                                    |                     |                                                                                                         |                                                                                                                                                                                                                                                                                                                                                                                                                                                                                                                                                                                                                                                                                                                                                                                                                                                                                                                                                           |                          |
|----------|--------------------------------------------------------|-----|------------------------------------|---------------------|---------------------------------------------------------------------------------------------------------|-----------------------------------------------------------------------------------------------------------------------------------------------------------------------------------------------------------------------------------------------------------------------------------------------------------------------------------------------------------------------------------------------------------------------------------------------------------------------------------------------------------------------------------------------------------------------------------------------------------------------------------------------------------------------------------------------------------------------------------------------------------------------------------------------------------------------------------------------------------------------------------------------------------------------------------------------------------|--------------------------|
|          |                                                        |     |                                    |                     | Tn5393, and<br>ISEc59)                                                                                  |                                                                                                                                                                                                                                                                                                                                                                                                                                                                                                                                                                                                                                                                                                                                                                                                                                                                                                                                                           |                          |
| Chickens | 2020-<br>2021<br>( <i>mcr</i> -1 to<br><i>mcr</i> -10) | 346 | <i>mcr</i> -1 (12 <i>E. coli</i> ) | IncI2 and<br>IncHI2 | ST29735,<br>ST43, ST10,<br>ST93, ST162,<br>ST2329,<br>ST189,<br>ST4689, and<br>ST259 (terC<br>and astA, | <i>aac</i> (3)-IIa, <i>aac</i> (3)-<br>IV, <i>aadA1</i> , <i>aadA2</i> ,<br><i>aadA5</i> , <i>aadA16</i> ,<br><i>aadA22</i> , <i>aadA24</i> ,<br><i>aadA2b</i> , <i>aph</i> (3')-Ia,<br><i>aph</i> (3')-IIa, <i>aph</i> (3'')-<br>Ib, <i>aph</i> (4)-IA,<br><i>aph</i> (6)-Id, <i>rmtB</i> ,<br><i>bla</i> <sub>CTXM-55</sub> , <i>bla</i> <sub>CTX-M-<br/>64</sub> , <i>bla</i> <sub>CTX-M-65</sub> ,<br><i>bla</i> <sub>OXA-10</sub> , <i>bla</i> <sub>TEM-141</sub> ,<br><i>bla</i> <sub>TEM-206</sub> , <i>bla</i> <sub>TEM-<br/>214</sub> , <i>bla</i> <sub>TEM-1B</sub> ,<br><i>bla</i> <sub>TEM-1C</sub> , <i>dfrA12</i> ,<br><i>dfrA14</i> , <i>dfrA17</i> ,<br><i>dfrA27</i> , <i>sul1</i> , <i>sul2</i> ,<br><i>sul3</i> , <i>oqxA</i> , <i>oqxB</i> ,<br><i>qnrS1</i> , <i>qnrS2</i> ,<br><i>lnu</i> (F), <i>mph</i> (A),<br><i>cmlA1</i> , <i>floR</i> , <i>fosA3</i> ,<br><i>arr-2</i> , <i>arr-3</i> , <i>tet</i> (A)<br>and <i>tet</i> (M) | Tang et al.<br>(2022)*** |

*mcr*: mobile colistin resistance gene; NA: not publicly-available; \*: study on preban (2016 downwards) isolates; \*\*\*study on postban (2017 upwards) isolates; \*\*: study on isolates collected preban and postban; PMCR: plasmid-mediated colistin resistance; GNB: Gram-negative bacteria; -: no data; Additional resistance traits: resistance factors identified in one *mcr*-positive isolate or pooled factors in more than one *mcr*-positive isolate; Sequence type: all sequence types of *mcr*-positive isolates; ST: sequence type; Plasmid: plasmid types identified in one or pooled *mcr*-positive isolates; Inc.: incompatibility; IS: insertion sequence, Δ: truncated; ESBL: Extended-spectrum β-lactamase; AmpC: Ampicillinase C
